# Supplementary material for: Exercise load monitoring: integrated approaches to advance the individualisation of exercise oncology
Source: HighWire-hosted journal article supplement (doi:10.1136/bmjsem-2021-001134), 2021-08-01
Supplement: bmjsem-2021-001134supp001_data_supplement.pdf [file bmjsem-2021-001134supp001_data_supplement.pdf]

Table 1. List of key terms.

| Terms                                  | Working Definition                                                                                                                                                   |
|----------------------------------------|----------------------------------------------------------------------------------------------------------------------------------------------------------------------|
| Adaptation                             | Behavioral, physiological, and structural changes in response to exercise training.                                                                                  |
| Cardiorespiratory fitness <sup>1</sup> | General ability to perform large muscle, dynamic moderate-to-vigorous exercise for prolonged periods.                                                                |
| Exercise training <sup>1</sup>         | Physical activity consisting of planned, structured, and repetitive bodily movement performed to improve and/or maintain one or more components of physical fitness. |
| Exercise prescription <sup>1</sup>     | Progression of exercise training modulated through changes in frequency, intensity, time, type, and volume.                                                          |
| Exercise tolerance                     | Reflects the voluntary ability to endure sustained exercise.                                                                                                         |
| External load                          | In the context of exercise, reflects the cumulative workload performed. Example: steps per day or distance traveled.                                                 |
| Internal load                          | In the context of exercise, reflects the cumulative physiological and psychological burden. Example: rating-of-perceived exertion or heart rate.                     |
| Non-exercise stressors                 | Includes such variables as diet and sleep that may influence adaptation.                                                                                             |
| Non-functional overreaching            | When internal and/or external load of exercise training exceeds recovery capacity. Often linked with stagnation or decreased performance.                            |
| Overload                               | Progressively increasing the demands of exercise training to trigger adaptation.                                                                                     |
| Principles of exercise training        | Multidimensional, includes specificity, overload, individualization, and reversibility.                                                                              |
| (Exercise) Recovery                    | Describes the global readiness in either the short- and/or long-term to exercise train.                                                                              |
| Smart watches                          | Wearable device with multiple applications that autonomously collect internal and external load data.                                                                |

<sup>1</sup>In accordance with the American College of Sports Medicine.
